# Supplementary material for: Tumor-associated exosomal miRNA biomarkers to differentiate metastatic vs. nonmetastatic non-small cell lung cancer
Source: publisher site journal article supplement (doi:10.1515/cclm-2019-1329), 2020-04-08
Supplement: Supplementary file 1 [file Tables S1.docx]

| | **Table S1: The fifty predicted target genes for hsa-miR-320a in miRDB** | | | | | | --- | --- | --- | --- | --- | | **Target Rank** | **Target Score** | **miRNA Name** | **Gene Symbol** | **Gene Description** | | 1 | 100 | hsa-miR-320a | [GCG](http://www.ncbi.nlm.nih.gov/entrez/query.fcgi?db=gene&cmd=Retrieve&dopt=full_report&list_uids=2641) | glucagon | | 2 | 100 | hsa-miR-320a | [LPPR1](http://www.ncbi.nlm.nih.gov/entrez/query.fcgi?db=gene&cmd=Retrieve&dopt=full_report&list_uids=54886) | lipid phosphate phosphatase-related protein type 1 | | 3 | 100 | hsa-miR-320a | [PBX3](http://www.ncbi.nlm.nih.gov/entrez/query.fcgi?db=gene&cmd=Retrieve&dopt=full_report&list_uids=5090) | pre-B-cell leukemia homeobox 3 | | 4 | 100 | hsa-miR-320a | [TGOLN2](http://www.ncbi.nlm.nih.gov/entrez/query.fcgi?db=gene&cmd=Retrieve&dopt=full_report&list_uids=10618) | trans-golgi network protein 2 | | 5 | 100 | hsa-miR-320a | [ABHD13](http://www.ncbi.nlm.nih.gov/entrez/query.fcgi?db=gene&cmd=Retrieve&dopt=full_report&list_uids=84945) | abhydrolase domain containing 13 | | 6 | 100 | hsa-miR-320a | [SLC2A12](http://www.ncbi.nlm.nih.gov/entrez/query.fcgi?db=gene&cmd=Retrieve&dopt=full_report&list_uids=154091) | solute carrier family 2 (facilitated glucose transporter), member 12 | | 7 | 100 | hsa-miR-320a | [RAB18](http://www.ncbi.nlm.nih.gov/entrez/query.fcgi?db=gene&cmd=Retrieve&dopt=full_report&list_uids=22931) | RAB18, member RAS oncogene family | | 8 | 99 | hsa-miR-320a | [YOD1](http://www.ncbi.nlm.nih.gov/entrez/query.fcgi?db=gene&cmd=Retrieve&dopt=full_report&list_uids=55432) | YOD1 deubiquitinase | | 9 | 99 | hsa-miR-320a | [PPM1B](http://www.ncbi.nlm.nih.gov/entrez/query.fcgi?db=gene&cmd=Retrieve&dopt=full_report&list_uids=5495) | protein phosphatase, Mg2+/Mn2+ dependent, 1B | | 10 | 99 | hsa-miR-320a | [SEMA3A](http://www.ncbi.nlm.nih.gov/entrez/query.fcgi?db=gene&cmd=Retrieve&dopt=full_report&list_uids=10371) | sema domain, immunoglobulin domain (Ig), short basic domain, secreted, (semaphorin) 3A | | 11 | 99 | hsa-miR-320a | [CNKSR2](http://www.ncbi.nlm.nih.gov/entrez/query.fcgi?db=gene&cmd=Retrieve&dopt=full_report&list_uids=22866) | connector enhancer of kinase suppressor of Ras 2 | | 12 | 99 | hsa-miR-320a | [HELZ](http://www.ncbi.nlm.nih.gov/entrez/query.fcgi?db=gene&cmd=Retrieve&dopt=full_report&list_uids=9931) | helicase with zinc finger | | 13 | 99 | hsa-miR-320a | [AFF4](http://www.ncbi.nlm.nih.gov/entrez/query.fcgi?db=gene&cmd=Retrieve&dopt=full_report&list_uids=27125) | AF4/FMR2 family, member 4 | | 14 | 98 | hsa-miR-320a | [IDE](http://www.ncbi.nlm.nih.gov/entrez/query.fcgi?db=gene&cmd=Retrieve&dopt=full_report&list_uids=3416) | insulin-degrading enzyme | | 15 | 98 | hsa-miR-320a | [PBX1](http://www.ncbi.nlm.nih.gov/entrez/query.fcgi?db=gene&cmd=Retrieve&dopt=full_report&list_uids=5087) | pre-B-cell leukemia homeobox 1 | | 16 | 98 | hsa-miR-320a | [SPOPL](http://www.ncbi.nlm.nih.gov/entrez/query.fcgi?db=gene&cmd=Retrieve&dopt=full_report&list_uids=339745) | speckle-type POZ protein-like | | 17 | 98 | hsa-miR-320a | [TMEM47](http://www.ncbi.nlm.nih.gov/entrez/query.fcgi?db=gene&cmd=Retrieve&dopt=full_report&list_uids=83604) | transmembrane protein 47 | | 18 | 98 | hsa-miR-320a | [TMEM108](http://www.ncbi.nlm.nih.gov/entrez/query.fcgi?db=gene&cmd=Retrieve&dopt=full_report&list_uids=66000) | transmembrane protein 108 | | 19 | 98 | hsa-miR-320a | [RNF185](http://www.ncbi.nlm.nih.gov/entrez/query.fcgi?db=gene&cmd=Retrieve&dopt=full_report&list_uids=91445) | ring finger protein 185 | | 20 | 98 | hsa-miR-320a | [MRPL35](http://www.ncbi.nlm.nih.gov/entrez/query.fcgi?db=gene&cmd=Retrieve&dopt=full_report&list_uids=51318) | mitochondrial ribosomal protein L35 | | 21 | 98 | hsa-miR-320a | [MLLT3](http://www.ncbi.nlm.nih.gov/entrez/query.fcgi?db=gene&cmd=Retrieve&dopt=full_report&list_uids=4300) | myeloid/lymphoid or mixed-lineage leukemia (trithorax homolog, Drosophila); translocated to, 3 | | 22 | 98 | hsa-miR-320a | [ARL8B](http://www.ncbi.nlm.nih.gov/entrez/query.fcgi?db=gene&cmd=Retrieve&dopt=full_report&list_uids=55207) | ADP-ribosylation factor-like 8B | | 23 | 98 | hsa-miR-320a | [DNER](http://www.ncbi.nlm.nih.gov/entrez/query.fcgi?db=gene&cmd=Retrieve&dopt=full_report&list_uids=92737) | delta/notch-like EGF repeat containing | | 24 | 97 | hsa-miR-320a | [BRWD3](http://www.ncbi.nlm.nih.gov/entrez/query.fcgi?db=gene&cmd=Retrieve&dopt=full_report&list_uids=254065) | bromodomain and WD repeat domain containing 3 | | 25 | 97 | hsa-miR-320a | [CAPRIN1](http://www.ncbi.nlm.nih.gov/entrez/query.fcgi?db=gene&cmd=Retrieve&dopt=full_report&list_uids=4076) | cell cycle associated protein 1 | | 26 | 97 | hsa-miR-320a | [CDH20](http://www.ncbi.nlm.nih.gov/entrez/query.fcgi?db=gene&cmd=Retrieve&dopt=full_report&list_uids=28316) | cadherin 20, type 2 | | 27 | 97 | hsa-miR-320a | [MLF1](http://www.ncbi.nlm.nih.gov/entrez/query.fcgi?db=gene&cmd=Retrieve&dopt=full_report&list_uids=4291) | myeloid leukemia factor 1 | | 28 | 97 | hsa-miR-320a | [KITLG](http://www.ncbi.nlm.nih.gov/entrez/query.fcgi?db=gene&cmd=Retrieve&dopt=full_report&list_uids=4254) | KIT ligand | | 29 | 96 | hsa-miR-320a | [BNC1](http://www.ncbi.nlm.nih.gov/entrez/query.fcgi?db=gene&cmd=Retrieve&dopt=full_report&list_uids=646) | basonuclin 1 | | 30 | 96 | hsa-miR-320a | [PNN](http://www.ncbi.nlm.nih.gov/entrez/query.fcgi?db=gene&cmd=Retrieve&dopt=full_report&list_uids=5411) | pinin, desmosome associated protein | | 31 | 96 | hsa-miR-320a | [RAI2](http://www.ncbi.nlm.nih.gov/entrez/query.fcgi?db=gene&cmd=Retrieve&dopt=full_report&list_uids=10742) | retinoic acid induced 2 | | 32 | 96 | hsa-miR-320a | [PCDHAC2](http://www.ncbi.nlm.nih.gov/entrez/query.fcgi?db=gene&cmd=Retrieve&dopt=full_report&list_uids=56134) | protocadherin alpha subfamily C, 2 | | 33 | 96 | hsa-miR-320a | [FRRS1L](http://www.ncbi.nlm.nih.gov/entrez/query.fcgi?db=gene&cmd=Retrieve&dopt=full_report&list_uids=23732) | ferric-chelate reductase 1-like | | 34 | 96 | hsa-miR-320a | [USP25](http://www.ncbi.nlm.nih.gov/entrez/query.fcgi?db=gene&cmd=Retrieve&dopt=full_report&list_uids=29761) | ubiquitin specific peptidase 25 | | 35 | 96 | hsa-miR-320a | [TROVE2](http://www.ncbi.nlm.nih.gov/entrez/query.fcgi?db=gene&cmd=Retrieve&dopt=full_report&list_uids=6738) | TROVE domain family, member 2 | | 36 | 96 | hsa-miR-320a | [ZBTB44](http://www.ncbi.nlm.nih.gov/entrez/query.fcgi?db=gene&cmd=Retrieve&dopt=full_report&list_uids=29068) | zinc finger and BTB domain containing 44 | | 37 | 96 | hsa-miR-320a | [MCL1](http://www.ncbi.nlm.nih.gov/entrez/query.fcgi?db=gene&cmd=Retrieve&dopt=full_report&list_uids=4170) | myeloid cell leukemia 1 | | 38 | 95 | hsa-miR-320a | [HECTD2](http://www.ncbi.nlm.nih.gov/entrez/query.fcgi?db=gene&cmd=Retrieve&dopt=full_report&list_uids=143279) | HECT domain containing E3 ubiquitin protein ligase 2 | | 39 | 95 | hsa-miR-320a | [CYP1A2](http://www.ncbi.nlm.nih.gov/entrez/query.fcgi?db=gene&cmd=Retrieve&dopt=full_report&list_uids=1544) | cytochrome P450, family 1, subfamily A, polypeptide 2 | | 40 | 95 | hsa-miR-320a | [GOLGA1](http://www.ncbi.nlm.nih.gov/entrez/query.fcgi?db=gene&cmd=Retrieve&dopt=full_report&list_uids=2800) | golgin A1 | | 41 | 95 | hsa-miR-320a | [NPAS2](http://www.ncbi.nlm.nih.gov/entrez/query.fcgi?db=gene&cmd=Retrieve&dopt=full_report&list_uids=4862) | neuronal PAS domain protein 2 | | 42 | 95 | hsa-miR-320a | [PAK7](http://www.ncbi.nlm.nih.gov/entrez/query.fcgi?db=gene&cmd=Retrieve&dopt=full_report&list_uids=57144) | p21 protein (Cdc42/Rac)-activated kinase 7 | | 43 | 95 | hsa-miR-320a | [CDK13](http://www.ncbi.nlm.nih.gov/entrez/query.fcgi?db=gene&cmd=Retrieve&dopt=full_report&list_uids=8621) | cyclin-dependent kinase 13 | | 44 | 95 | hsa-miR-320a | [BROX](http://www.ncbi.nlm.nih.gov/entrez/query.fcgi?db=gene&cmd=Retrieve&dopt=full_report&list_uids=148362) | BRO1 domain and CAAX motif containing | | 45 | 95 | hsa-miR-320a | [ARF1](http://www.ncbi.nlm.nih.gov/entrez/query.fcgi?db=gene&cmd=Retrieve&dopt=full_report&list_uids=375) | ADP-ribosylation factor 1 | | 46 | 95 | hsa-miR-320a | [RASA1](http://www.ncbi.nlm.nih.gov/entrez/query.fcgi?db=gene&cmd=Retrieve&dopt=full_report&list_uids=5921) | RAS p21 protein activator (GTPase activating protein) 1 | | 47 | 95 | hsa-miR-320a | [YWHAH](http://www.ncbi.nlm.nih.gov/entrez/query.fcgi?db=gene&cmd=Retrieve&dopt=full_report&list_uids=7533) | tyrosine 3-monooxygenase/tryptophan 5-monooxygenase activation protein, eta | | 48 | 94 | hsa-miR-320a | [DGKB](http://www.ncbi.nlm.nih.gov/entrez/query.fcgi?db=gene&cmd=Retrieve&dopt=full_report&list_uids=1607) | diacylglycerol kinase, beta 90kDa | | 49 | 94 | hsa-miR-320a | [KLF5](http://www.ncbi.nlm.nih.gov/entrez/query.fcgi?db=gene&cmd=Retrieve&dopt=full_report&list_uids=688) | Kruppel-like factor 5 (intestinal) | | 50 | 94 | hsa-miR-320a | [ETV1](http://www.ncbi.nlm.nih.gov/entrez/query.fcgi?db=gene&cmd=Retrieve&dopt=full_report&list_uids=2115) | ets variant 1 | |
| --- | --- | --- | --- | --- | --- | --- | --- | --- | --- | --- | --- | --- | --- | --- | --- | --- | --- | --- | --- | --- | --- | --- | --- | --- | --- | --- | --- | --- | --- | --- | --- | --- | --- | --- | --- | --- | --- | --- | --- | --- | --- | --- | --- | --- | --- | --- | --- | --- | --- | --- | --- | --- | --- | --- | --- | --- | --- | --- | --- | --- | --- | --- | --- | --- | --- | --- | --- | --- | --- | --- | --- | --- | --- | --- | --- | --- | --- | --- | --- | --- | --- | --- | --- | --- | --- | --- | --- | --- | --- | --- | --- | --- | --- | --- | --- | --- | --- | --- | --- | --- | --- | --- | --- | --- | --- | --- | --- | --- | --- | --- | --- | --- | --- | --- | --- | --- | --- | --- | --- | --- | --- | --- | --- | --- | --- | --- | --- | --- | --- | --- | --- | --- | --- | --- | --- | --- | --- | --- | --- | --- | --- | --- | --- | --- | --- | --- | --- | --- | --- | --- | --- | --- | --- | --- | --- | --- | --- | --- | --- | --- | --- | --- | --- | --- | --- | --- | --- | --- | --- | --- | --- | --- | --- | --- | --- | --- | --- | --- | --- | --- | --- | --- | --- | --- | --- | --- | --- | --- | --- | --- | --- | --- | --- | --- | --- | --- | --- | --- | --- | --- | --- | --- | --- | --- | --- | --- | --- | --- | --- | --- | --- | --- | --- | --- | --- | --- | --- | --- | --- | --- | --- | --- | --- | --- | --- | --- | --- | --- | --- | --- | --- | --- | --- | --- | --- | --- | --- | --- | --- | --- | --- | --- | --- | --- | --- | --- | --- | --- | --- | --- | --- | --- | --- | --- | --- | --- | --- | --- | --- | --- |
