# Supplementary material for: Tumor-associated exosomal miRNA biomarkers to differentiate metastatic vs. nonmetastatic non-small cell lung cancer
Source: publisher site journal article supplement (doi:10.1515/cclm-2019-1329), 2020-04-08
Supplement: Supplementary file 2 [file Tables S2.docx]

| | **Table S2: The fifty predicted target genes for hsa-let-7f-5p in miRDB** | | | | | | --- | --- | --- | --- | --- | | **Target Rank** | **Target Score** | **miRNA Name** | **Gene Symbol** | **Gene Description** | | 1 | 100 | hsa-let-7f-5p | [SMARCAD1](http://www.ncbi.nlm.nih.gov/entrez/query.fcgi?db=gene&cmd=Retrieve&dopt=full_report&list_uids=56916) | SWI/SNF-related, matrix-associated actin-dependent regulator of chromatin, subfamily a, containing DEAD/H box 1 | | 2 | 100 | hsa-let-7f-5p | [FAM178A](http://www.ncbi.nlm.nih.gov/entrez/query.fcgi?db=gene&cmd=Retrieve&dopt=full_report&list_uids=55719) | family with sequence similarity 178, member A | | 3 | 100 | hsa-let-7f-5p | [LIN28B](http://www.ncbi.nlm.nih.gov/entrez/query.fcgi?db=gene&cmd=Retrieve&dopt=full_report&list_uids=389421) | lin-28 homolog B (C. elegans) | | 4 | 99 | hsa-let-7f-5p | [ZBTB5](http://www.ncbi.nlm.nih.gov/entrez/query.fcgi?db=gene&cmd=Retrieve&dopt=full_report&list_uids=9925) | zinc finger and BTB domain containing 5 | | 5 | 99 | hsa-let-7f-5p | [GNPTAB](http://www.ncbi.nlm.nih.gov/entrez/query.fcgi?db=gene&cmd=Retrieve&dopt=full_report&list_uids=79158) | N-acetylglucosamine-1-phosphate transferase, alpha and beta subunits | | 6 | 99 | hsa-let-7f-5p | [GATM](http://www.ncbi.nlm.nih.gov/entrez/query.fcgi?db=gene&cmd=Retrieve&dopt=full_report&list_uids=2628) | glycine amidinotransferase (L-arginine:glycine amidinotransferase) | | 7 | 99 | hsa-let-7f-5p | [LRIG3](http://www.ncbi.nlm.nih.gov/entrez/query.fcgi?db=gene&cmd=Retrieve&dopt=full_report&list_uids=121227) | leucine-rich repeats and immunoglobulin-like domains 3 | | 8 | 98 | hsa-let-7f-5p | [ADRB2](http://www.ncbi.nlm.nih.gov/entrez/query.fcgi?db=gene&cmd=Retrieve&dopt=full_report&list_uids=154) | adrenoceptor beta 2, surface | | 9 | 98 | hsa-let-7f-5p | [BZW1](http://www.ncbi.nlm.nih.gov/entrez/query.fcgi?db=gene&cmd=Retrieve&dopt=full_report&list_uids=9689) | basic leucine zipper and W2 domains 1 | | 10 | 98 | hsa-let-7f-5p | [ADAMTS8](http://www.ncbi.nlm.nih.gov/entrez/query.fcgi?db=gene&cmd=Retrieve&dopt=full_report&list_uids=11095) | ADAM metallopeptidase with thrombospondin type 1 motif, 8 | | 11 | 98 | hsa-let-7f-5p | [PDP2](http://www.ncbi.nlm.nih.gov/entrez/query.fcgi?db=gene&cmd=Retrieve&dopt=full_report&list_uids=57546) | pyruvate dehyrogenase phosphatase catalytic subunit 2 | | 12 | 98 | hsa-let-7f-5p | [DNA2](http://www.ncbi.nlm.nih.gov/entrez/query.fcgi?db=gene&cmd=Retrieve&dopt=full_report&list_uids=1763) | DNA replication helicase/nuclease 2 | | 13 | 98 | hsa-let-7f-5p | [C8orf58](http://www.ncbi.nlm.nih.gov/entrez/query.fcgi?db=gene&cmd=Retrieve&dopt=full_report&list_uids=541565) | chromosome 8 open reading frame 58 | | 14 | 97 | hsa-let-7f-5p | [IGDCC3](http://www.ncbi.nlm.nih.gov/entrez/query.fcgi?db=gene&cmd=Retrieve&dopt=full_report&list_uids=9543) | immunoglobulin superfamily, DCC subclass, member 3 | | 15 | 97 | hsa-let-7f-5p | [TMPRSS2](http://www.ncbi.nlm.nih.gov/entrez/query.fcgi?db=gene&cmd=Retrieve&dopt=full_report&list_uids=7113) | transmembrane protease, serine 2 | | 16 | 97 | hsa-let-7f-5p | [NME6](http://www.ncbi.nlm.nih.gov/entrez/query.fcgi?db=gene&cmd=Retrieve&dopt=full_report&list_uids=10201) | NME/NM23 nucleoside diphosphate kinase 6 | | 17 | 97 | hsa-let-7f-5p | [TTLL4](http://www.ncbi.nlm.nih.gov/entrez/query.fcgi?db=gene&cmd=Retrieve&dopt=full_report&list_uids=9654) | tubulin tyrosine ligase-like family, member 4 | | 18 | 96 | hsa-let-7f-5p | [MAPK6](http://www.ncbi.nlm.nih.gov/entrez/query.fcgi?db=gene&cmd=Retrieve&dopt=full_report&list_uids=5597) | mitogen-activated protein kinase 6 | | 19 | 96 | hsa-let-7f-5p | [ZFYVE26](http://www.ncbi.nlm.nih.gov/entrez/query.fcgi?db=gene&cmd=Retrieve&dopt=full_report&list_uids=23503) | zinc finger, FYVE domain containing 26 | | 20 | 96 | hsa-let-7f-5p | [SCN4B](http://www.ncbi.nlm.nih.gov/entrez/query.fcgi?db=gene&cmd=Retrieve&dopt=full_report&list_uids=6330) | sodium channel, voltage-gated, type IV, beta subunit | | 21 | 96 | hsa-let-7f-5p | [HIC2](http://www.ncbi.nlm.nih.gov/entrez/query.fcgi?db=gene&cmd=Retrieve&dopt=full_report&list_uids=23119) | hypermethylated in cancer 2 | | 22 | 96 | hsa-let-7f-5p | [DMD](http://www.ncbi.nlm.nih.gov/entrez/query.fcgi?db=gene&cmd=Retrieve&dopt=full_report&list_uids=1756) | dystrophin | | 23 | 95 | hsa-let-7f-5p | [COL3A1](http://www.ncbi.nlm.nih.gov/entrez/query.fcgi?db=gene&cmd=Retrieve&dopt=full_report&list_uids=1281) | collagen, type III, alpha 1 | | 24 | 95 | hsa-let-7f-5p | [LIMD2](http://www.ncbi.nlm.nih.gov/entrez/query.fcgi?db=gene&cmd=Retrieve&dopt=full_report&list_uids=80774) | LIM domain containing 2 | | 25 | 95 | hsa-let-7f-5p | [PCGF3](http://www.ncbi.nlm.nih.gov/entrez/query.fcgi?db=gene&cmd=Retrieve&dopt=full_report&list_uids=10336) | polycomb group ring finger 3 | | 26 | 95 | hsa-let-7f-5p | [TMEM2](http://www.ncbi.nlm.nih.gov/entrez/query.fcgi?db=gene&cmd=Retrieve&dopt=full_report&list_uids=23670) | transmembrane protein 2 | | 27 | 95 | hsa-let-7f-5p | [FZD3](http://www.ncbi.nlm.nih.gov/entrez/query.fcgi?db=gene&cmd=Retrieve&dopt=full_report&list_uids=7976) | frizzled class receptor 3 | | 28 | 95 | hsa-let-7f-5p | [SMIM3](http://www.ncbi.nlm.nih.gov/entrez/query.fcgi?db=gene&cmd=Retrieve&dopt=full_report&list_uids=85027) | small integral membrane protein 3 | | 29 | 94 | hsa-let-7f-5p | [CLP1](http://www.ncbi.nlm.nih.gov/entrez/query.fcgi?db=gene&cmd=Retrieve&dopt=full_report&list_uids=10978) | cleavage and polyadenylation factor I subunit 1 | | 30 | 94 | hsa-let-7f-5p | [EIF4G2](http://www.ncbi.nlm.nih.gov/entrez/query.fcgi?db=gene&cmd=Retrieve&dopt=full_report&list_uids=1982) | eukaryotic translation initiation factor 4 gamma, 2 | | 31 | 94 | hsa-let-7f-5p | [COIL](http://www.ncbi.nlm.nih.gov/entrez/query.fcgi?db=gene&cmd=Retrieve&dopt=full_report&list_uids=8161) | coilin | | 32 | 94 | hsa-let-7f-5p | [ACVR1C](http://www.ncbi.nlm.nih.gov/entrez/query.fcgi?db=gene&cmd=Retrieve&dopt=full_report&list_uids=130399) | activin A receptor, type IC | | 33 | 94 | hsa-let-7f-5p | [SLC25A27](http://www.ncbi.nlm.nih.gov/entrez/query.fcgi?db=gene&cmd=Retrieve&dopt=full_report&list_uids=9481) | solute carrier family 25, member 27 | | 34 | 94 | hsa-let-7f-5p | [B3GNT7](http://www.ncbi.nlm.nih.gov/entrez/query.fcgi?db=gene&cmd=Retrieve&dopt=full_report&list_uids=93010) | UDP-GlcNAc:betaGal beta-1,3-N-acetylglucosaminyltransferase 7 | | 35 | 94 | hsa-let-7f-5p | [PRTG](http://www.ncbi.nlm.nih.gov/entrez/query.fcgi?db=gene&cmd=Retrieve&dopt=full_report&list_uids=283659) | protogenin | | 36 | 94 | hsa-let-7f-5p | [NPHP3](http://www.ncbi.nlm.nih.gov/entrez/query.fcgi?db=gene&cmd=Retrieve&dopt=full_report&list_uids=27031) | nephronophthisis 3 (adolescent) | | 37 | 93 | hsa-let-7f-5p | [GNG5](http://www.ncbi.nlm.nih.gov/entrez/query.fcgi?db=gene&cmd=Retrieve&dopt=full_report&list_uids=2787) | guanine nucleotide binding protein (G protein), gamma 5 | | 38 | 93 | hsa-let-7f-5p | [MAP4K3](http://www.ncbi.nlm.nih.gov/entrez/query.fcgi?db=gene&cmd=Retrieve&dopt=full_report&list_uids=8491) | mitogen-activated protein kinase kinase kinase kinase 3 | | 39 | 93 | hsa-let-7f-5p | [UTRN](http://www.ncbi.nlm.nih.gov/entrez/query.fcgi?db=gene&cmd=Retrieve&dopt=full_report&list_uids=7402) | utrophin | | 40 | 93 | hsa-let-7f-5p | [CCNJ](http://www.ncbi.nlm.nih.gov/entrez/query.fcgi?db=gene&cmd=Retrieve&dopt=full_report&list_uids=54619) | cyclin J | | 41 | 93 | hsa-let-7f-5p | [NAP1L1](http://www.ncbi.nlm.nih.gov/entrez/query.fcgi?db=gene&cmd=Retrieve&dopt=full_report&list_uids=4673) | nucleosome assembly protein 1-like 1 | | 42 | 93 | hsa-let-7f-5p | [FOXP2](http://www.ncbi.nlm.nih.gov/entrez/query.fcgi?db=gene&cmd=Retrieve&dopt=full_report&list_uids=93986) | forkhead box P2 | | 43 | 93 | hsa-let-7f-5p | [PARD6B](http://www.ncbi.nlm.nih.gov/entrez/query.fcgi?db=gene&cmd=Retrieve&dopt=full_report&list_uids=84612) | par-6 family cell polarity regulator beta | | 44 | 93 | hsa-let-7f-5p | [TRIM71](http://www.ncbi.nlm.nih.gov/entrez/query.fcgi?db=gene&cmd=Retrieve&dopt=full_report&list_uids=131405) | tripartite motif containing 71, E3 ubiquitin protein ligase | | 45 | 93 | hsa-let-7f-5p | [IGF2BP3](http://www.ncbi.nlm.nih.gov/entrez/query.fcgi?db=gene&cmd=Retrieve&dopt=full_report&list_uids=10643) | insulin-like growth factor 2 mRNA binding protein 3 | | 46 | 92 | hsa-let-7f-5p | [NR6A1](http://www.ncbi.nlm.nih.gov/entrez/query.fcgi?db=gene&cmd=Retrieve&dopt=full_report&list_uids=2649) | nuclear receptor subfamily 6, group A, member 1 | | 47 | 92 | hsa-let-7f-5p | [UHRF2](http://www.ncbi.nlm.nih.gov/entrez/query.fcgi?db=gene&cmd=Retrieve&dopt=full_report&list_uids=115426) | ubiquitin-like with PHD and ring finger domains 2, E3 ubiquitin protein ligase | | 48 | 92 | hsa-let-7f-5p | [ACER2](http://www.ncbi.nlm.nih.gov/entrez/query.fcgi?db=gene&cmd=Retrieve&dopt=full_report&list_uids=340485) | alkaline ceramidase 2 | | 49 | 92 | hsa-let-7f-5p | [NHLRC3](http://www.ncbi.nlm.nih.gov/entrez/query.fcgi?db=gene&cmd=Retrieve&dopt=full_report&list_uids=387921) | NHL repeat containing 3 | | 50 | 92 | hsa-let-7f-5p | [LRIG2](http://www.ncbi.nlm.nih.gov/entrez/query.fcgi?db=gene&cmd=Retrieve&dopt=full_report&list_uids=9860) | leucine-rich repeats and immunoglobulin-like domains 2 | |
| --- | --- | --- | --- | --- | --- | --- | --- | --- | --- | --- | --- | --- | --- | --- | --- | --- | --- | --- | --- | --- | --- | --- | --- | --- | --- | --- | --- | --- | --- | --- | --- | --- | --- | --- | --- | --- | --- | --- | --- | --- | --- | --- | --- | --- | --- | --- | --- | --- | --- | --- | --- | --- | --- | --- | --- | --- | --- | --- | --- | --- | --- | --- | --- | --- | --- | --- | --- | --- | --- | --- | --- | --- | --- | --- | --- | --- | --- | --- | --- | --- | --- | --- | --- | --- | --- | --- | --- | --- | --- | --- | --- | --- | --- | --- | --- | --- | --- | --- | --- | --- | --- | --- | --- | --- | --- | --- | --- | --- | --- | --- | --- | --- | --- | --- | --- | --- | --- | --- | --- | --- | --- | --- | --- | --- | --- | --- | --- | --- | --- | --- | --- | --- | --- | --- | --- | --- | --- | --- | --- | --- | --- | --- | --- | --- | --- | --- | --- | --- | --- | --- | --- | --- | --- | --- | --- | --- | --- | --- | --- | --- | --- | --- | --- | --- | --- | --- | --- | --- | --- | --- | --- | --- | --- | --- | --- | --- | --- | --- | --- | --- | --- | --- | --- | --- | --- | --- | --- | --- | --- | --- | --- | --- | --- | --- | --- | --- | --- | --- | --- | --- | --- | --- | --- | --- | --- | --- | --- | --- | --- | --- | --- | --- | --- | --- | --- | --- | --- | --- | --- | --- | --- | --- | --- | --- | --- | --- | --- | --- | --- | --- | --- | --- | --- | --- | --- | --- | --- | --- | --- | --- | --- | --- | --- | --- | --- | --- | --- | --- | --- | --- | --- | --- | --- | --- | --- | --- | --- | --- | --- | --- |
