# Supplementary material for: Tumor-associated exosomal miRNA biomarkers to differentiate metastatic vs. nonmetastatic non-small cell lung cancer
Source: publisher site journal article supplement (doi:10.1515/cclm-2019-1329), 2020-04-08
Supplement: Supplementary file 4 [file Tables S4.docx]

| **Table S4: Different miRNAs simultaneously targeted genes** | | | |
| --- | --- | --- | --- |
| **Rank** | **miR-320a vs miR-622** | **miR-622 vs let7f-5p** | **let-7f-5p vs miR-320a** |
| 1 | MIER1 | BZW1 | TRIM41 |
| 2 | MTDH | SPRYD4 | ZNF652 |
| 3 | ESRRG | RAB11FIP4 | DNAJA2 |
| 4 | CREB5 | HOXA1 |  |
| 5 | PURB | SMARCAD1 |
| 6 | DMD | SCYL3 |
| 7 | CDH20 | NHLRC3 |
| 8 | CDK6 | RIOK3 |
| 9 | CNOT7 | KLHL23 |
| 10 | ELL2 | ZBTB37 |
| 11 | EYA4 | TARBP2 |
| 12 | GPBP1 | ELOVL4 |
| 13 | ING5 | GPR157 |
| 14 | KLF13 | FNDC3A |
| 15 | MLLT3 | BLOC1S6 |
| 16 | PCGF3 | CHUK |
| 17 | RASA1 | LGR4 |
| 18 | SATB2 | PDGFB |
| 19 | AP3M1 | ZBTB5 |
| 20 | ATXN1 | TMEM255A |
| 21 | AZIN1 | KCTD16 |
| 22 | CALN1 | MAP3K2 |
| 23 | CLASP1 | ATXN1L |
| 24 | ENAH | GREB1 |
| 25 | FLRT3 | PPP1R12B |
| 26 | GABPB2 | NAPEPLD |
| 27 | GSPT1 | MAP3K9 |
| 28 | HOXB4 | MLXIP |
| 29 | IGF1R | RNF217 |
| 30 | LRCH2 |  |
| 31 | LUC7L2 |
| 32 | MAPK1 |
| 33 | MCL1 |
| 34 | MMP16 |
| 35 | MRPS25 |
| 36 | MUC13 |
| 37 | NCDN |
| 38 | PHF1 |
| 39 | PHF8 |
| 40 | PHOX2B |
| 41 | POGZ |
| 42 | PPM1A |
| 43 | PPP1R16B |
| 44 | RAD18 |
| 45 | SPCS2 |
| 46 | SPRED2 |
| 47 | TBL1XR1 |
| 48 | TDG |
| 49 | TLK2 |
| 50 | TMEM47 |
| 51 | TOMM70A |
| 52 | TRAF7 |
| 53 | TSPYL5 |
| 54 | UBE2D3 |
| 55 | USP20 |
| 56 | USP25 |
| 57 | YTHDF3 |
| 58 | YWHAZ |
| 59 | ZIC3 |
| 60 | ANKFY1 |
| 61 | ARID2 |
| 62 | AUTS2 |
| 63 | BCL11B |
| 64 | CCND2 |
| 65 | CFL2 |
| 66 | CHMP4C |
| 67 | CNOT6 |
| 68 | CRK |
| 69 | DCBLD2 |
| 70 | E2F1 |
| 71 | EDNRB |
| 72 | EIF5A2 |
| 73 | ELOVL6 |
| 74 | EPB41L5 |
| 75 | ETF1 |
| 76 | FBXO28 |
| 77 | GMFB |
| 78 | GNS |
| 79 | HIC2 |
| 80 | ID4 |
| 81 | LMAN1 |
| 82 | LRRC4 |
| 83 | PARD6G |
| 84 | PHTF2 |
| 85 | PLCG1 |
| 86 | RAB14 |
| 87 | RPS6KB1 |
| 88 | RSBN1 |
| 89 | STIM2 |
| 90 | TARDBP |
| 91 | TCEA1 |
| 92 | TPD52 |
| 93 | TRIM2 |
| 94 | VKORC1L1 |
| 95 | ZC3H11A |
| 96 | ZHX1 |
